# Supplementary material for: D2I and F9Y Mutations in the NS1 Protein of Influenza A Virus Affect Viral Replication via Regulating Host Innate Immune Responses
Source: MDPI journal article supplement (doi:10.3390/v14061206), 2022-06-01
Supplement: s1 [file s1]

**Table S1.** Identified NS1 mutations of 24 purified plaques from passaged NS1 random mutant library virus.

| Virus Number | NS1(nt) mutation                   | NS1 aa mutation |
|--------------|------------------------------------|-----------------|
| 1            | <i>a172t+a435g</i>                 | T58S+I145M      |
| 2            | - <sup>a</sup>                     | -               |
| 3            | -                                  | -               |
| 4            | <i>a661g</i>                       | K221E           |
| 5            | <i>c245t</i>                       | A82V            |
| 6            | <i>t284c</i>                       | L95P            |
| 7            | <i>t26a</i>                        | F9Y             |
| 8            | -                                  | -               |
| 9            | -                                  | -               |
| 10           | <i>t26a</i>                        | F9Y             |
| 11           | <i>a11c+t284a+</i><br><i>a515c</i> | N4T+L95H+E172A  |
| 12           | <i>g4a a5t+t26a</i>                | D2I+F9Y         |
| 13           | <i>g4a a5t+a172t</i>               | D2I+T58S        |
| 14           | -                                  | -               |
| 15           | -                                  | -               |
| 16           | <i>t26a</i>                        | F9Y             |
| 17           | <i>a172t+a435g</i>                 | T58S+I145M      |
| 18           | -                                  | -               |
| 19           | -                                  | -               |
| 20           | <i>t26a</i>                        | F9Y             |
| 21           | -                                  | -               |
| 22           | -                                  | -               |
| 23           | <i>t26a</i>                        | F9Y             |
| 24           | -                                  | -               |

<sup>a</sup> unmutated.
